# Supplementary material for: Gene expression drives local adaptation in humans
Source: HighWire-hosted journal article supplement (doi:10.1101/gr.152710.112), 2013-03-28
Supplement: Supplemental_Table_1.xlsx [file Supplemental_Table_1.xlsx]

## Sheet: Sheet1
Table S1. Enrichments for every eSNP/climate variable pair. Pairs with > 2-fold enrichment and p < 10-5 are in bold.
Fold-enrichments over expected (1 = no enrichment)
			LCL (Xia et al. 2012)	LCL (Pickrell et al. 2010)	LCL (Montgomery et al. 2010)	LCL (Ge et al. 2009)	LCL (Stranger et al. 2012, eSNPs present in multiple populations)	LCL (Stranger et al. 2012, eSNPs present in any population)	LCL splicing (Montgomery et al. 2010)	LCL splicing (Pickrell et al. 2010)	LCL splicing (Kwan et al. 2008)	LCL splicing (Fraser et al. 2009)	Monocytes (Zeller et al. 2010)	Whole blood (Fehrmann et al. 2011)	B cells (Fairfax et al. 2012)	Monocytes (Fairfax et al. 2012)	Liver (Schadt et al. 2008)	Liver (Innocenti et al. 2011)	Brain (Gibbs et al. 2010)	Brain (Myers et al. 2007)	Skin (Ding et al. 2010)
latitude			1.3351	2.9412	2.4211	1.8182	1.7483	1.2577	1.7993	0	3.0769	2	1.3362	1.322	1.1376	1.2996	0.83333	1.3559	0.875	0.90909	1.5152
avg min winter temp			1.3511	0.58824	1.8333	1.0526	2.9091	0.98734	1.1299	20	0.58824	1.2	1.1669	1.1719	0.9987	1.2774	0.96	1.3699	0.75269	0.76923	1.2446
avg max summer temp			1.2231	0	1.5385	1.375	1.1574	1.1735	1.5132	0	0.83333	2.6374	1.5385	1.3052	1.413	1.2986	1.6822	1.7808	1.4103	1.3699	1.5306
summer precip			1.2749	0.71429	1.1628	0.88235	0.79365	1.0357	1.5679	0	1.1111	1.3265	1.2478	1.1969	1.0147	1.1401	0.7874	2.0833	1.6981	1.7188	1.0881
winter precip			1.2603	3.0769	0.91837	2.2222	2.0144	1.0429	1.5867	0	0	2.439	1.1429	1.3276	0.96491	1.2048	0.79208	1.0417	1.6667	1.5873	2.6829
summer sw radiation flux			1.3932	1.25	2.7027	2	1.3665	1.4663	1.5033	3.3333	2	1.5957	1.3085	1.4409	1.1973	1.3929	1.6393	0.52632	0.78125	2.1429	2.4306
winter sw radiation flux			1.552	0.95238	1.3793	1.0112	1.3143	1.0486	1.2158	0	0.83333	2.8302	1.3439	1.6108	1.3342	1.2687	1.3821	1	0.81633	1.0811	1.8378
summer humidity			1.4299	0.90909	1.7949	2.2581	1.125	1.1709	1.5225	Inf	0	1.3483	1.2964	1.3723	1.3115	1.1523	1.3793	1.0811	2.2727	2.4074	2.0482
winter humidity			1.4286	2	1.5217	1.4286	1.4	1.7252	1.7857	0	4.1667	3.6585	1.4041	1.4077	1.1773	1.3124	1.3821	1.7241	1.6667	1.6883	1.7442
log10(enrichment p-values)
			LCL (Xia et al. 2012)	LCL (Pickrell et al. 2010)	LCL (Montgomery et al. 2010)	LCL (Ge et al. 2009)	LCL (Stranger et al. 2012, eSNPs present in multiple populations)	LCL (Stranger et al. 2012, eSNPs present in any population)	LCL splicing (Montgomery et al. 2010)	LCL splicing (Pickrell et al. 2010)	LCL splicing (Kwan et al. 2008)	LCL splicing (Fraser et al. 2009)	Monocytes (Zeller et al. 2010)	Whole blood (Fehrmann et al. 2011)	B cells (Fairfax et al. 2012)	Monocytes (Fairfax et al. 2012)	Liver (Schadt et al. 2008)	Liver (Innocenti et al. 2011)	Brain (Gibbs et al. 2010)	Brain (Myers et al. 2007)	Skin (Ding et al. 2010)
latitude			-3.5456	-2.0969	-4.2511	-1.5977	-2.4657	-1.1946	-4.431	NA	-1.9721	-2.5225	-3.5966	-5.2212	-0.94802	-2.5818	-0.176	-0.84585	-0.26198	-0.3269	-1.9249
avg min winter temp			-4.1625	-0.2952	-2.5161	-0.45017	-10.121	-0.31034	-0.7134	-3.8106	-0.2952	-0.71226	-1.5883	-2.4933	-0.32396	-2.5706	-0.31783	-0.91659	-0.14871	-0.2	-0.9884
avg max summer temp			-2.2215	NA	-1.2624	-0.95108	-0.70447	-0.90874	-2.5056	NA	-0.47189	-4.9839	-7.8808	-5.7968	-3.4789	-2.7068	-1.8622	-1.7534	-1.0086	-0.91659	-1.9807
summer precip			-2.7128	-0.38916	-0.60595	-0.28393	-0.14728	-0.42321	-2.7508	NA	-0.64298	-0.9158	-2.335	-2.7856	-0.37656	-1.0778	-0.14166	-1.9823	-1.356	-1.5129	-0.52527
winter precip			-2.4178	-1.9721	-0.28667	-2.6542	-3.5746	-0.44377	-2.7607	NA	NA	-3.8828	-1.1888	-5.0813	-0.23405	-1.6035	-0.16856	-0.45718	-1.1942	-1.2496	-6.5705
summer sw radiation flux			-4.6243	-0.66426	-4.4946	-2.2428	-1.2118	-2.39	-2.4544	-1.4325	-1.0448	-1.5101	-3.1926	-9.8919	-1.3634	-3.9627	-1.8643	-0.086212	-0.21024	-2.2887	-5.9135
winter sw radiation flux			-8.0312	-0.45547	-1.0914	-0.39857	-1.093	-0.46571	-1.0191	NA	-0.47189	-6.5623	-4.0138	-14.068	-2.6042	-2.3851	-1.1238	-0.39655	-0.19097	-0.48899	-3.3957
summer humidity			-4.9893	-0.52148	-1.8502	-2.719	-0.58897	-0.8318	-2.4799	NA	NA	-0.93155	-3.1244	-7.8849	-2.349	-1.2007	-1.0914	-0.50476	-2.8692	-2.8457	-4.2589
winter humidity			-4.9694	-1.1828	-1.316	-1.0065	-1.2749	-4.0974	-4.2199	NA	-2.8238	-9.0209	-4.8167	-8.713	-1.2088	-2.7634	-1.1238	-1.4572	-1.4284	-1.5833	-2.7633
