# Supplementary material for: Gene expression drives local adaptation in humans
Source: HighWire-hosted journal article supplement (doi:10.1101/gr.152710.112), 2013-03-28
Supplement: Supplemental_Text_Legends.docx [file Supplemental_Text_Legends.docx]

**Supplemental Note**

*Advantages of using local adaptation*

There are four major reasons why local adaptations are especially suitable for this analysis, compared to the many different types of genome-wide scans for positive selection in humans. First, any methods relying on fixed differences between species cannot be used, because eSNPs can only be mapped within species. Second, any methods relying on dN/dS-type metrics cannot be used since they are only applicable to nonsynonymous changes. Third, any methods that preferentially identify long LD blocks as those under selection are not ideal, since each LD block contains too many SNPs to reliably separate the effects of NS and regulatory variants (it may be for this reason that there is only slight overlap between eSNPs and genomic regions with the largest iHS scores (Kudaravalli et al 2009)). The ideal method is one that identifies much smaller LD blocks under selection, as is done by scans for local adaptation. Fourth, the particular environmental variable(s) associated with each putative local adaptation SNP suggests potential selection pressures (e.g. solar radiation) responsible for these adaptations.

*Inferring tissue-specificity of selection on eSNPs*

The fact that some eSNPs are restricted to a subset of tissues means that in some cases it may be possible to infer in what tissue(s) selection has acted to alter gene expression—a major advantage over purely genome-sequence based approaches. However caution should be exercised, since eSNPs have not yet been mapped in the vast majority of human tissues. Only once a far more comprehensive catalog of eSNPs across tissues is available will it be possible to make more definitive conclusions regarding tissue-specific gene expression adaptations.

*Relationship to King and Wilson’s hypothesis*

In a seminal paper (King and Wilson 1975), King and Wilson proposed that the proteins of humans and chimpanzees “are so alike that regulatory mutations may account for their biological differences”. In contrast to the similarity of protein sequences (and other properties of proteins such as electrophoretic mobility), they noted that “there may be more difference at the nucleic acid level than at the protein level in human and chimpanzee genomes”, based on hybridization properties of the two genomes. With the aid of complete genome sequences, we now know that this is indeed the case, and that many of the nucleotide changes indirectly deduced by King and Wilson do in fact affect the regulation of gene expression. This work supports their hypothesis by demonstrating that a larger fraction of recent human local adaptations appear to be involved in the *cis*-regulation of gene expression, as opposed to affecting protein sequence. King and Wilson further suggested that “A relatively small number of genetic changes in systems controlling the expression of genes may account for the major organismal differences between humans and chimpanzees”; the current results neither support nor refute this aspect of their hypothesis, since although it appears that a large number of gene expression changes have contributed to recent human adaptation, it is still entirely possible that a relatively small number of regulatory changes may account for the “major organismal differences between humans and chimpanzees”.

*Comparing the gene-set-based test of selection on eSNPs to previous selection scans*

Over 20 studies have been published reporting genome-wide “selection scans” in humans (see references in (Akey 2009), and more recent examples such as (Hancock et al 2011)). Nearly all of these follow a common theme, outlined in Fig 1 of (Akey 2009): some statistic is applied to SNP genotypes from various individuals, and then outliers in the empirical distribution of this statistic are called “significant”. However due to the lack of any suitable null model of neutrality, these tests cannot actually distinguish whether a SNP or haplotype fits a neutral model, and therefore they cannot conclude anything about the extent of natural selection detected by their approach. In other words, the same number of SNPs would be called “significant” if there was no selection at all, as compared to if selection was widespread. This same reasoning applies to comparisons of gene expression level diversity within species vs. divergence between species (e.g. (Gilad et al 2006)): they cannot distinguish neutral from non-neutral evolution.

In contrast, the gene-set-based test introduced here includes a rigorous null model of neutrality. Comparing the real gene set associations to random associations generated from random groupings of eSNPs from the same eSNP data set controls perfectly for population structure, as well as any ascertainment biases present in the eSNP set. For this reason, the p-values produced by the test are testing an actual null model of neutrality, and rejection of this null model implies the action of natural selection.

*Comparing NS SNP/local adaptation SNP enrichment to results of Hancock et al.*

In (Hancock et al 2011), NS SNPs are reported as enriched among putative local adaptation SNPs. However these results cannot be directly compared with those in Figure 1B, because of several key differences in the analysis—e.g. this analysis was performed at the level of LD blocks, as opposed to single SNPs, and this analysis controlled for MAF and LD block length.

*Numbers of overlaps vs. fold-enrichments for NS and* cis*-regulatory SNPs*

In this work I chose to compare the number of NS/*cis-*regulatory SNPs overlapping with local adaptations (above that expected by chance), as opposed to the fold-enrichment above that expected. The former is a measure of the relative prevalence of each type of SNP in local adaptation, while the latter is a measure of the chance that any particular NS or *cis-*regulatory SNP is involved in local adaptation. Since the former was the main question motivating this study (and the question most relevant to King and Wilson’s (1975) hypothesis), I chose to focus on the number of overlaps (Figure 1B). However *cis-*regulatory SNPs also show a higher fold-enrichment among local adaptations than do NS SNPs, meaning that any given *cis-*regulatory SNP is more likely to be involved in local adaptation than a given NS SNP. Since the total number of eSNPs used for each overlap (red bars in Figure 1B) was on average ~2x (the exact number depends on which eSNP sets passed the stepwise regression; see Methods) the number of NS SNPs, dividing the red bars in Figure 1B by two gives an approximate estimate of the relative fold-enrichments.

*Estimating the fraction of local adaptation explained by eSNPs, CRE SNPs, and NS SNPs*

Because the false discovery rate for putative local adaptation SNPs is unknown (Hancock et al 2011), it is not possible to estimate what fraction of local adaptation SNPs are explained by eSNPs, CRE SNPs, or NS SNPs. For example, imagine that every one of the 0.5% x 623,318 = 3,117 SNPs truly represented a climate-associated local adaptation. In this case, the fraction of local adaptation SNPs explained by eSNPs would be the height of the red bars in Fig 1B divided by 3,117, which is less than 3% for all nine climate variables. However if instead many of the climate-associations are false positives, then the fraction of the true-positives explained by eSNPs would be higher. Because the false-positive rate among the climate-associated SNPs is unknown—and cannot even be reliably estimated—it is not possible to even approximately estimate the fraction of climate associations explained by any of the SNP classes in this study. Likewise, it is not possible to estimate what fraction of local adaptations are *not* explained by any of these SNP classes. Importantly, however, this unknown fraction of false positives does not affect estimates of the *relative* contributions of different SNP classes shown in Fig 1B.

**Supplemental Figure and Table Legends**

**Supplemental Table 1.** The fold-enrichments and enrichment *p*-values for all eSNP set/climate variable pairs. Those in bold have >2-fold enrichment and *p* < 10-5.

**Supplemental Table 2.** eSNP target gene, rsID, and allele frequency information for the three gene sets shown in Fig. 3B-D.

**Supplemental Figure 1.** The same as Fig. 1B, but with randomized local-adaptation SNP scores; no significant enrichments are observed in this negative control.

**Supplemental Figure 2.** The same as Fig. 1B, but with LD blocks defined by SNPs with *r*2 > 0.8 in YRI HapMap samples, instead of *r*2 > 0.9.

**Supplemental Figure 3.** The same as Fig. 1B, but with LD blocks defined by SNPs with *r*2 > 0.9 in CEU HapMap samples, instead of in YRI samples.

**Supplemental Figure 4.** The same as Fig. 1B, but defining putative local adaptation SNPs as those in the top 1% of the 623,318 SNPs tested for each climate variable, instead of the top 0.5%.

**Supplemental Figure 5.** The same as Fig. 1B, but using putative local-adaptation SNPs identified after 15,000 MCMC “burn-in” iterations, instead of zero (data provided by D. Witonsky and A. Di Rienzo).

**Supplemental Figure 6.** **A.** The same data as shown in Fig. 2B, but with populations in each geographic region placed on the X-axis in order of increasing summer shortwave radiation, and with two additional populations from Oceania. Lines are least-squares linear fits of the data from each geographic region (the discontinuities are due to the lines being generated using each population’s actual shortwave radiation, but displayed with populations equally spaced on the X-axis). Figure generated with dbCLINE (http://genapps2.uchicago.edu:8081/dbcline/main.jsp). **B.** Scatter plot of all data from Fig. 2B, plus two populations from Oceania.

**Supplemental Figure 7.** Histogram of correlations representing “random associations” (Fig. 3A), with 106 groups of 16 randomly chosen eSNPs compared with latitude (matching the “cell proliferation” gene set from Fig. 3D). One random association exceeds the absolute value of the observed association (*r* = -0.88). **Supplemental references**

Gilad Y, Oshlack A, Smyth GK, Speed TP, White KP. Expression profiling in primates reveals a rapid evolution of human transcription factors. *Nature* 440: 242 (2006).

Kudaravalli S, et al. Gene expression levels are a target of recent natural selection in the human genome*. Mol Biol Evol*. 26, 649 (2009).
